# Supplementary material for: LINC00606 promotes glioblastoma progression through sponge miR-486-3p and interaction with ATP11B
Source: Springer Nature journal article supplement (doi:10.1186/s13046-024-03058-z), 2024-05-09

**Fig 3 h**

**h**

|              |   |   |   |   |
|--------------|---|---|---|---|
| inhibitor NC | + | - | - | - |
| inhibitor    | - | + | - | - |
| mimic NC     | - | - | + | - |
| mimic        | - | - | - | + |

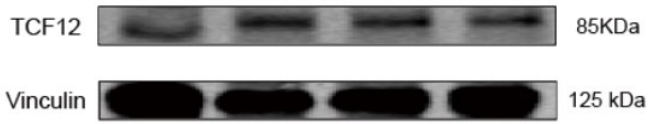

|              |   |   |   |   |
|--------------|---|---|---|---|
| Inhibitor NC | + | - | - | - |
| inhibitor    | - | + | - | - |
| mimic NC     | - | - | + | - |
| mimic        | - | - | - | + |

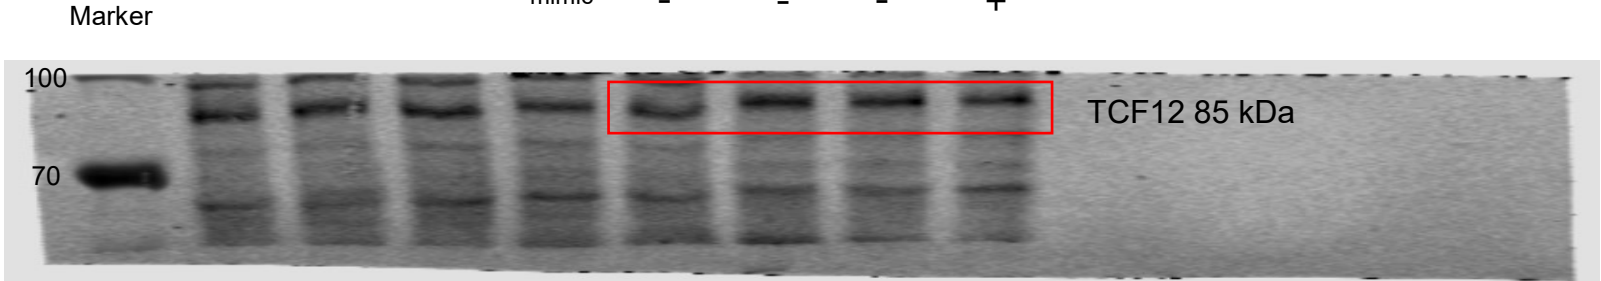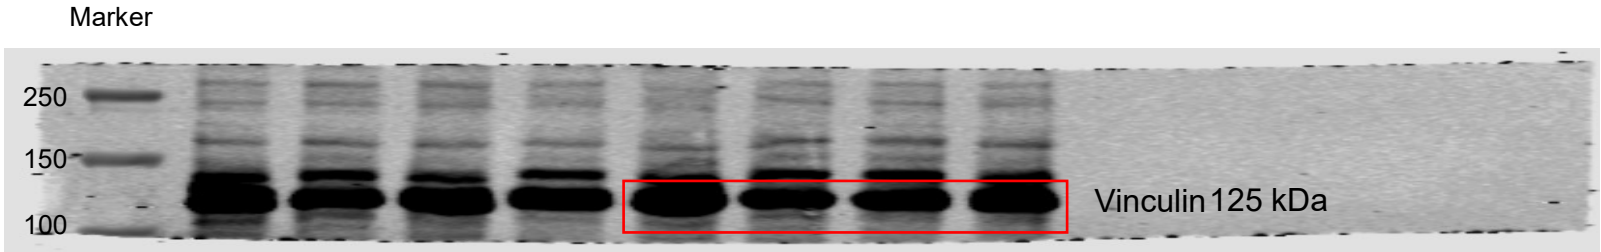

**Fig 3 n**

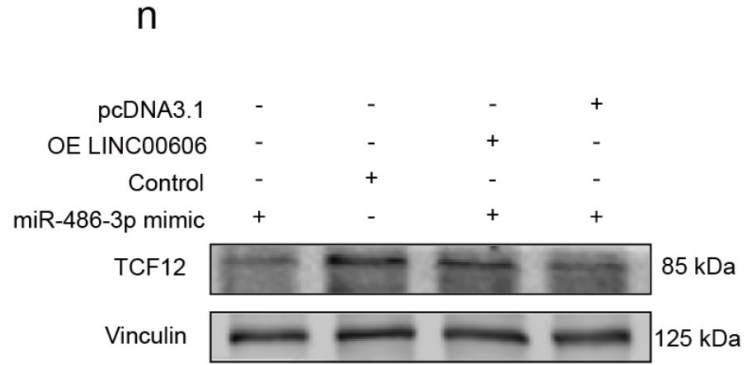

|                  |   |   |   |   |
|------------------|---|---|---|---|
| pcDNA3.1         | - | - | - | + |
| OE LINC00606     | - | - | + | - |
| Control          | - | + | - | - |
| miR-486-3p mimic | + | - | + | + |

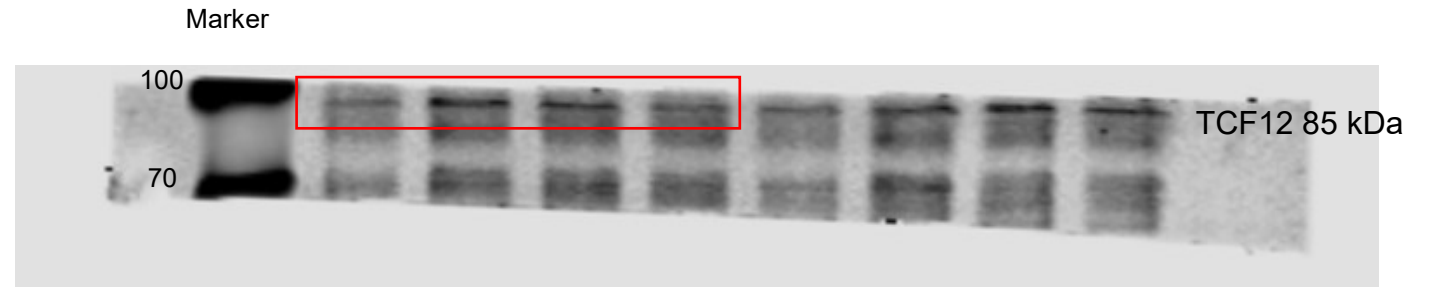

|                  |   |   |   |   |
|------------------|---|---|---|---|
| pcDNA3.1         | - | - | - | + |
| OE LINC00606     | - | - | + | - |
| Control          | - | + | - | - |
| miR-486-3p mimic | + | - | + | + |

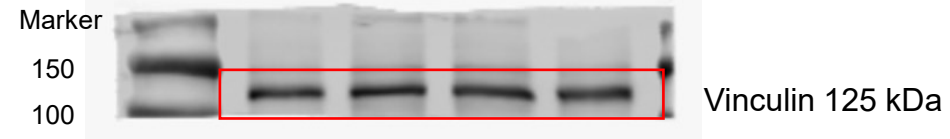

**Fig 4 a**

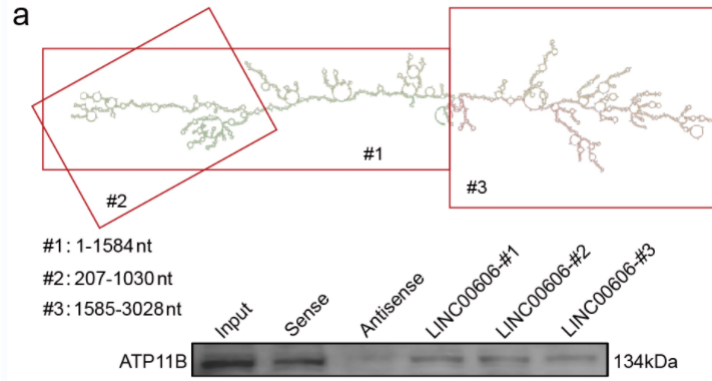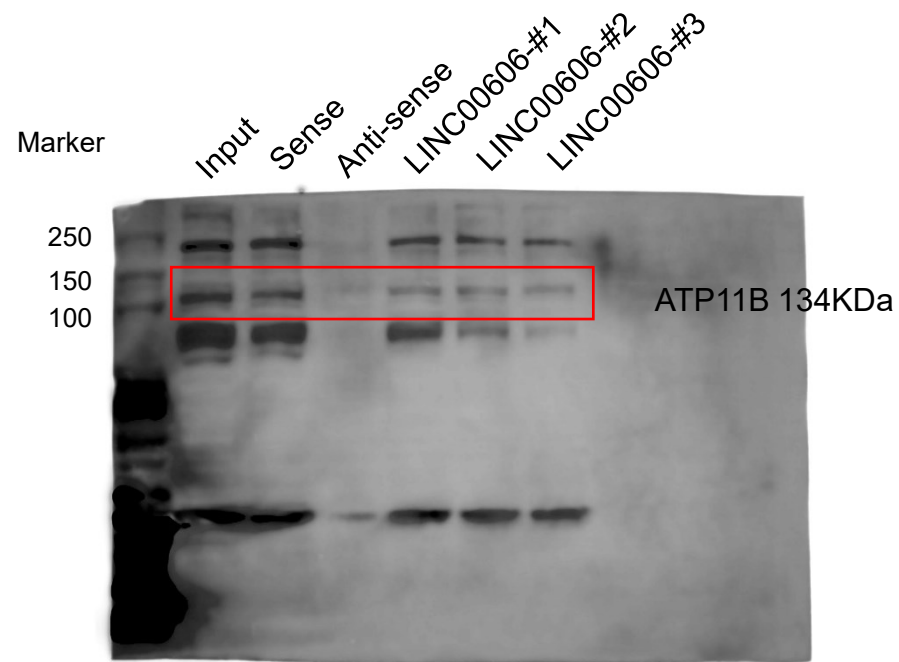

**Fig 4 d**

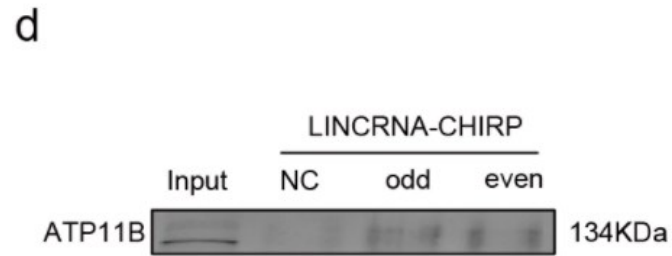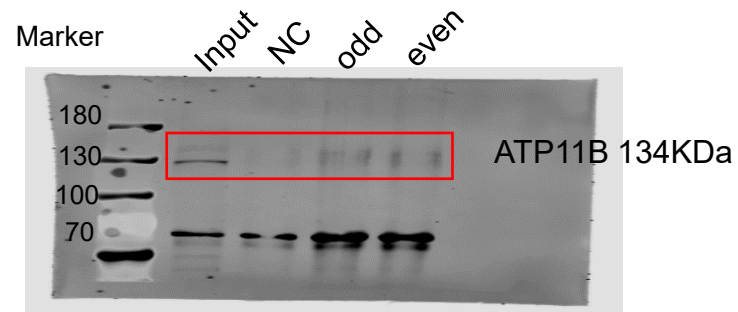

**Fig 4 j**

j

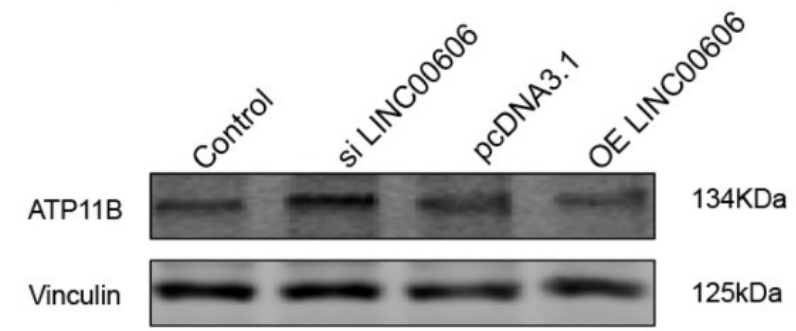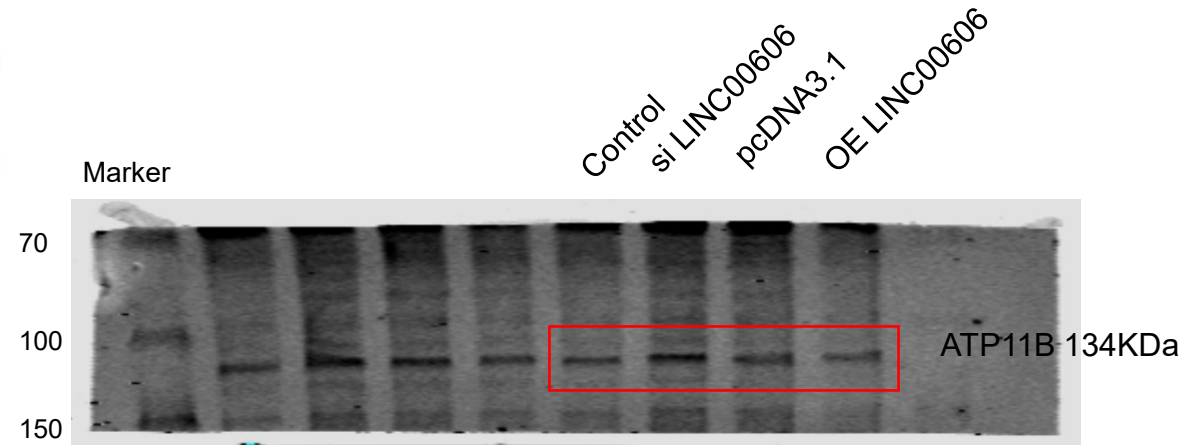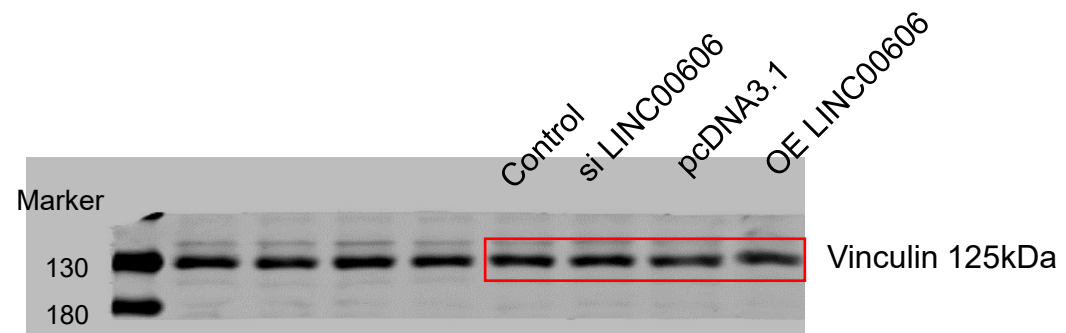

**Fig 5 p**

**p**

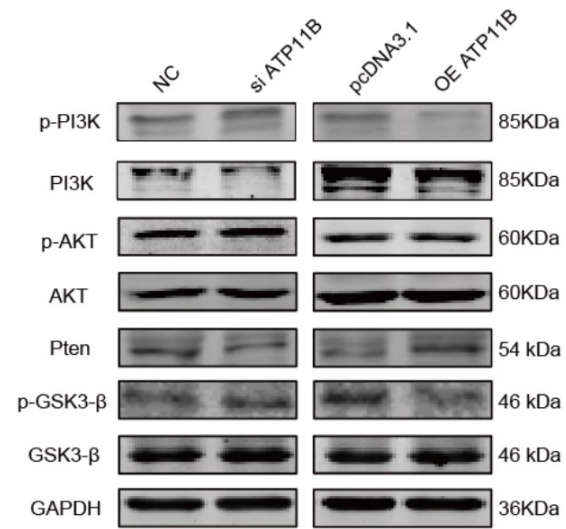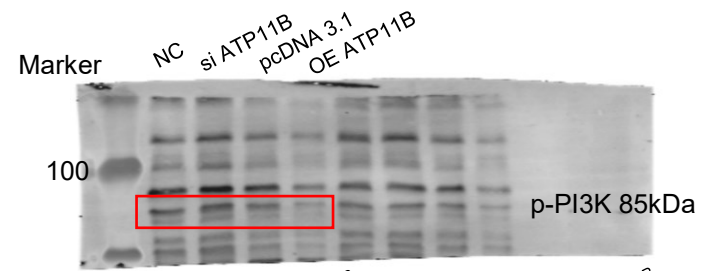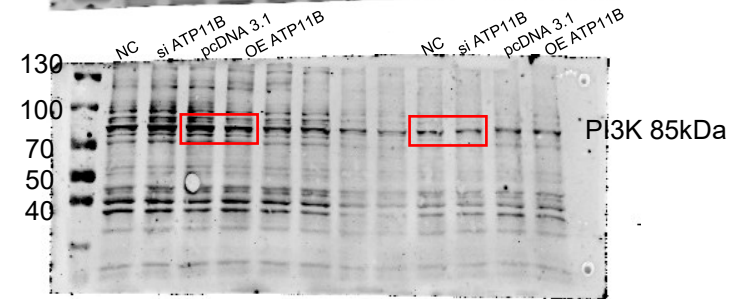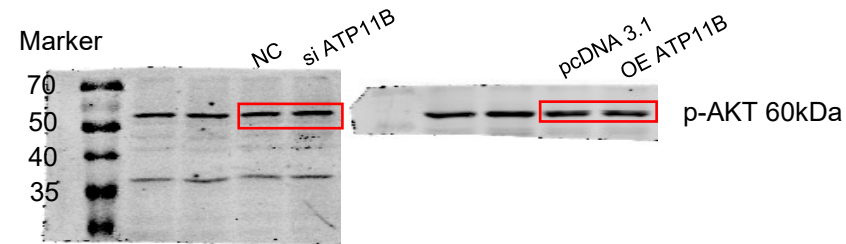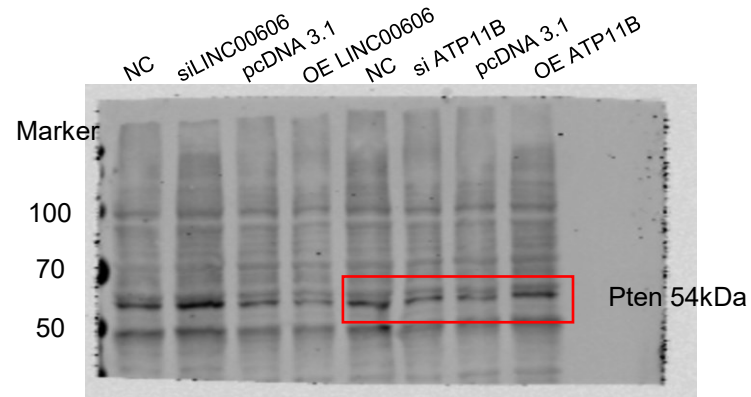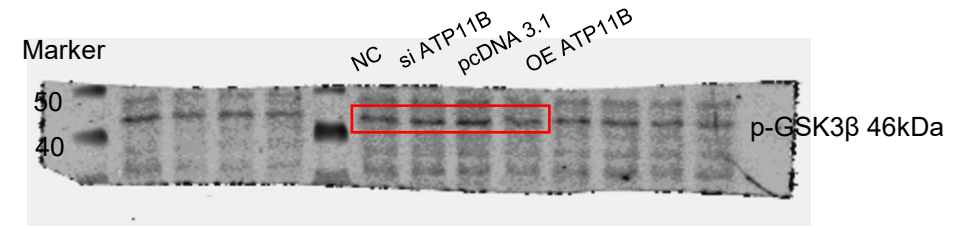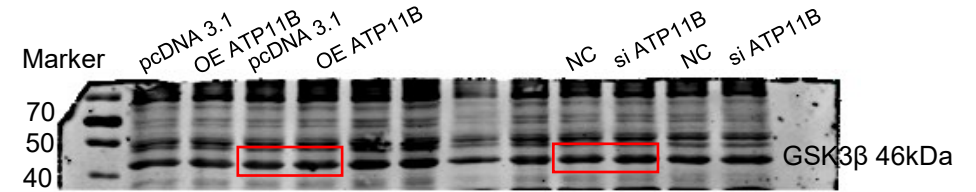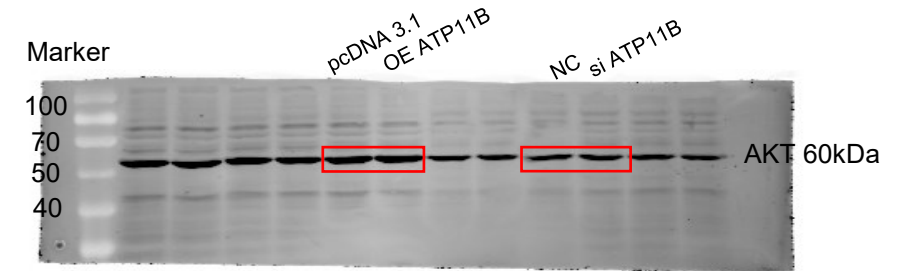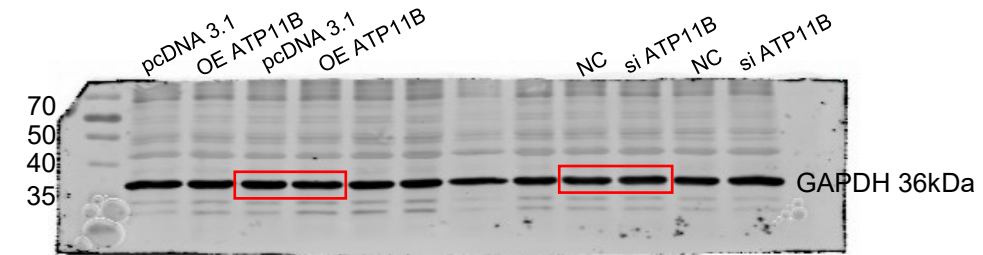

**Fig 5 q**

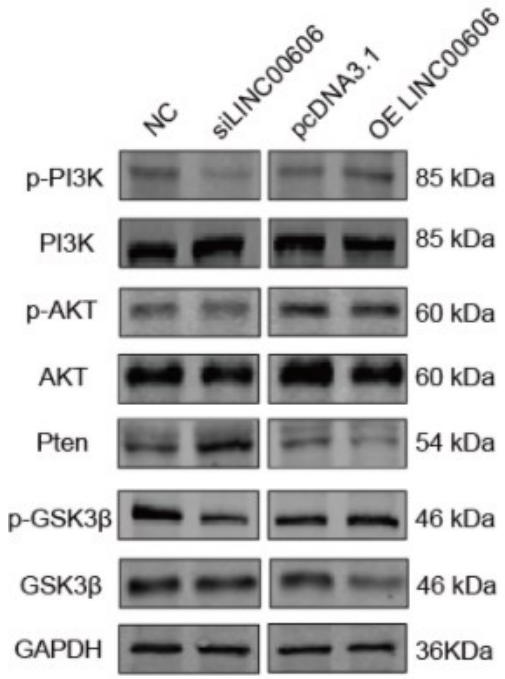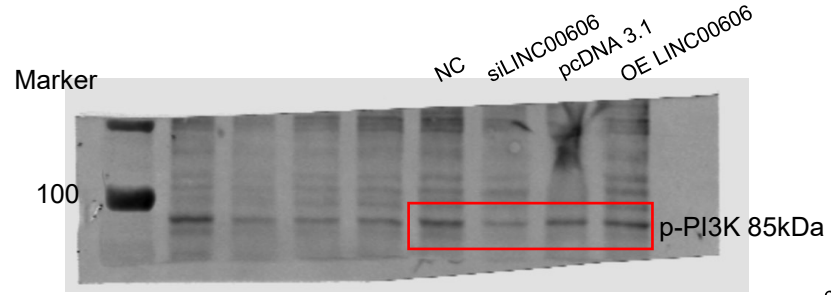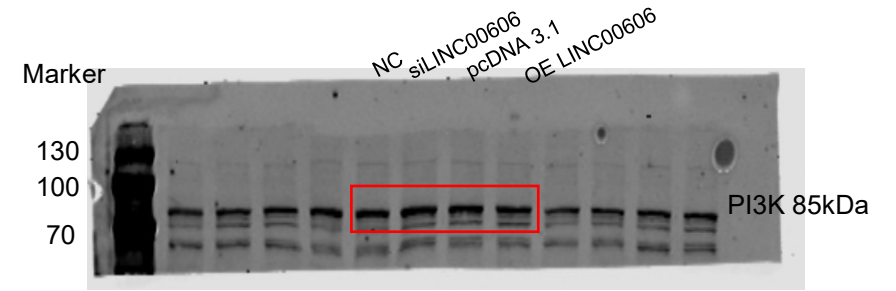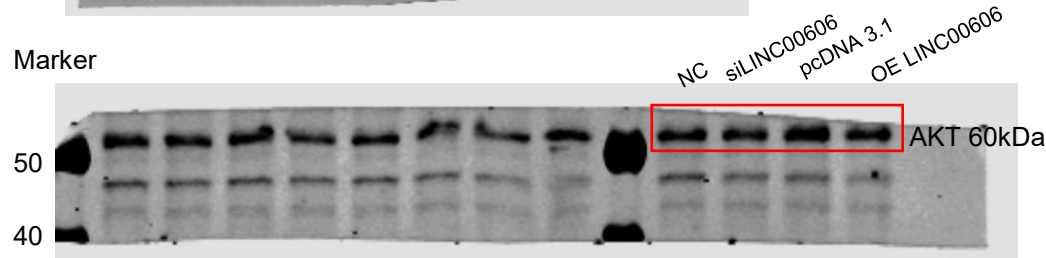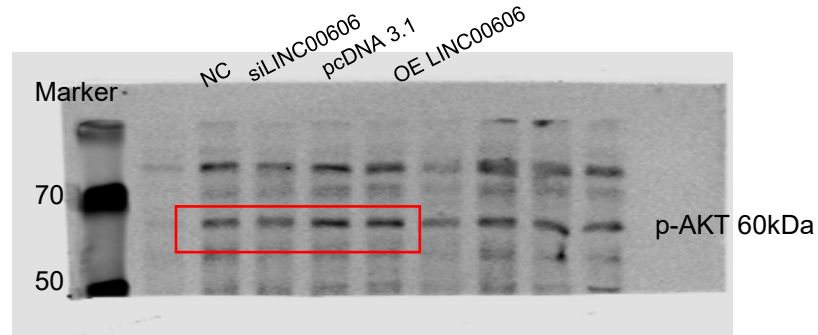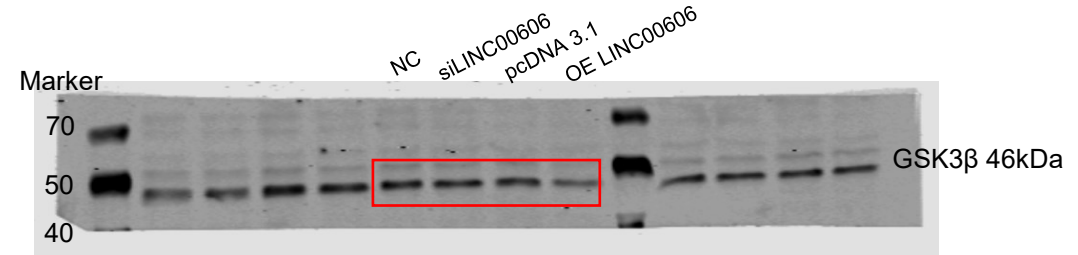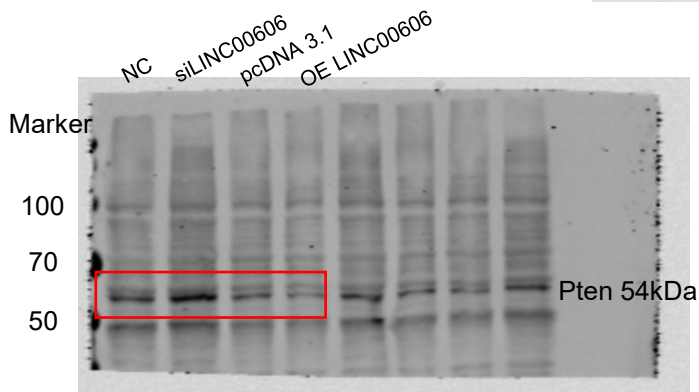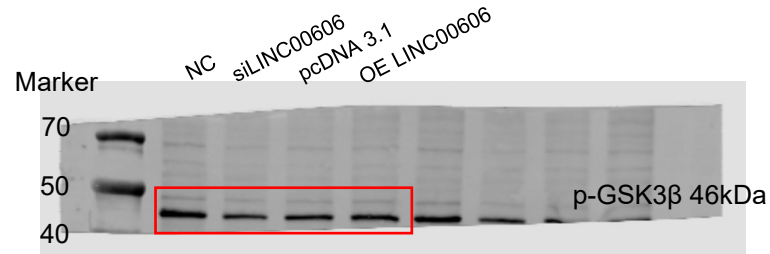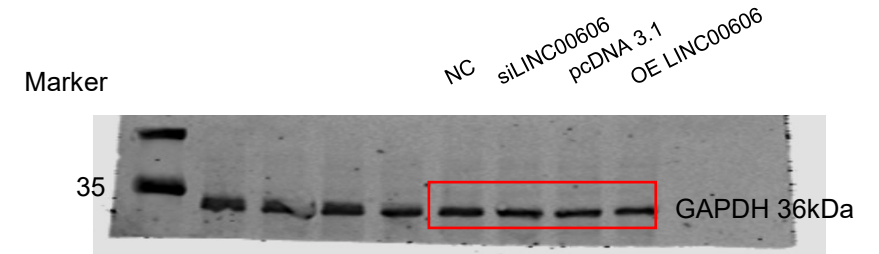



Fig 5 r

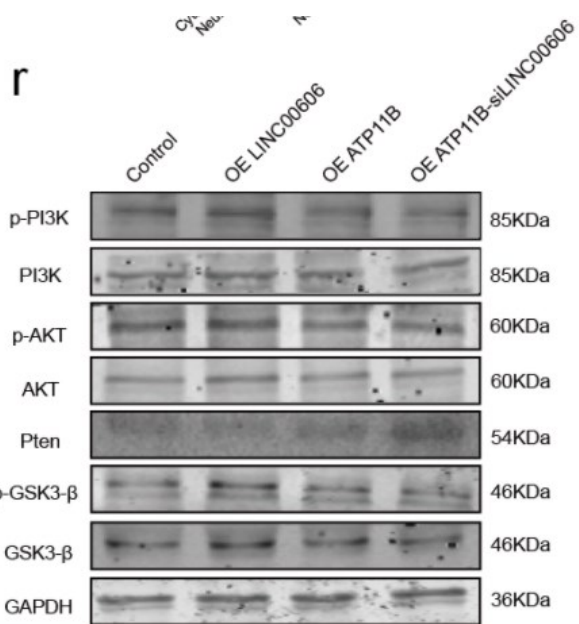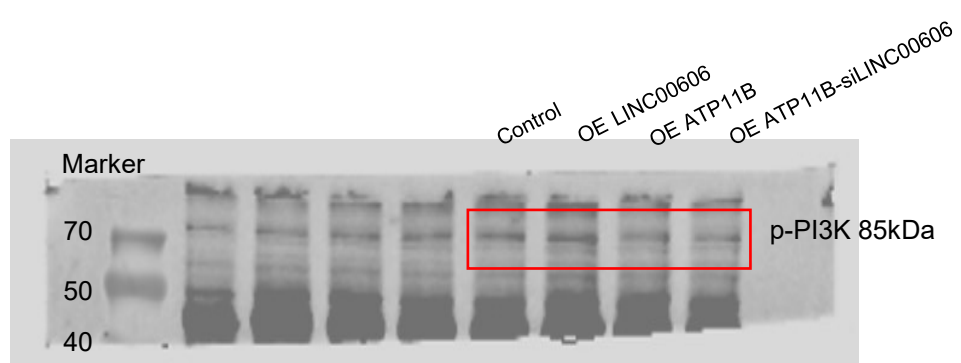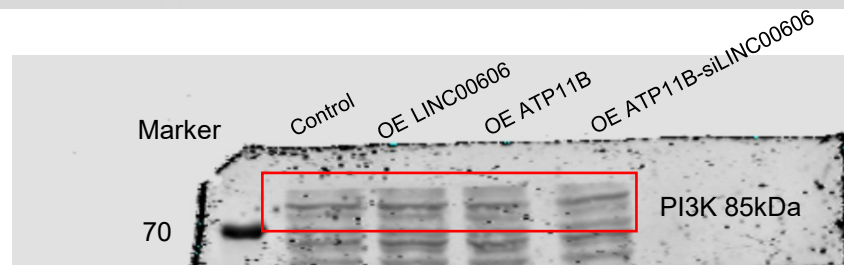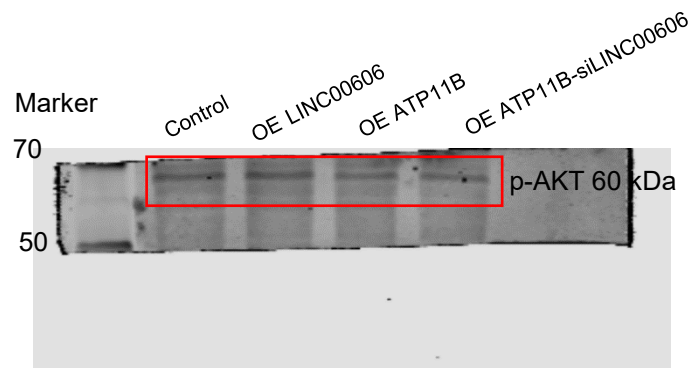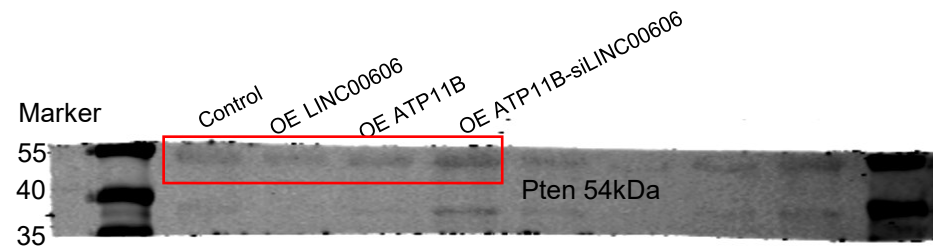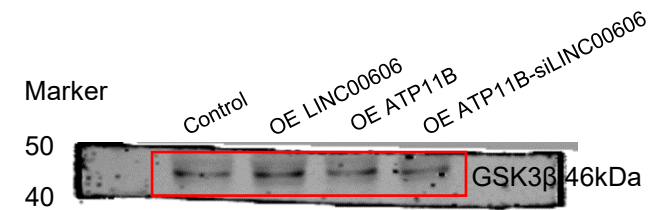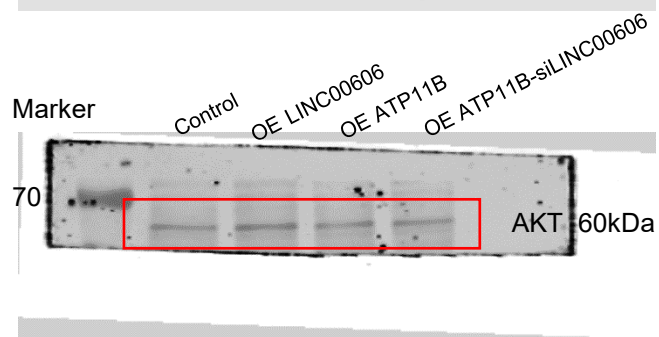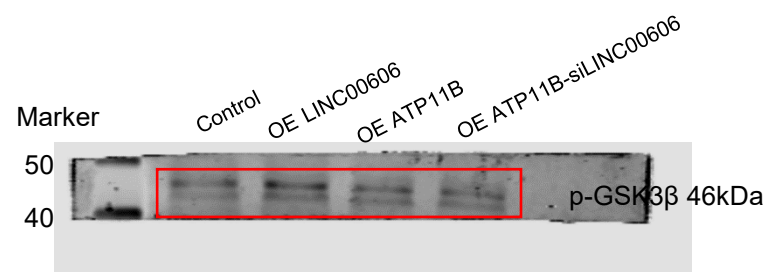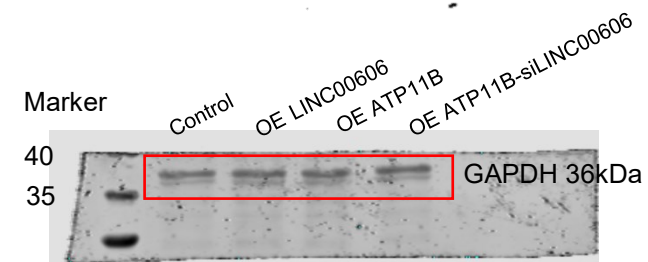

**Fig 6 i**

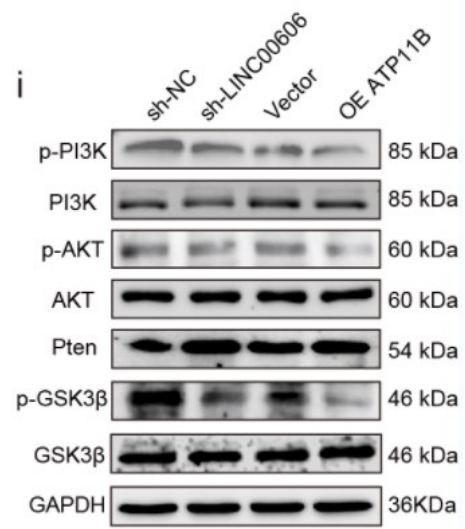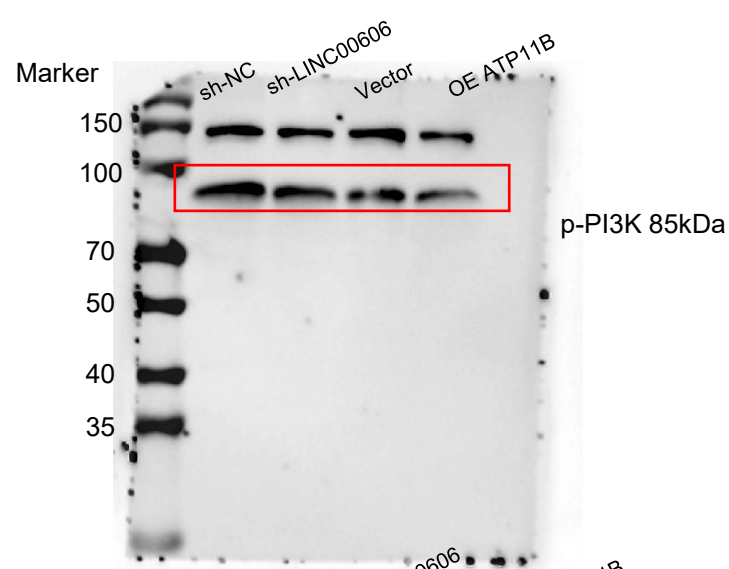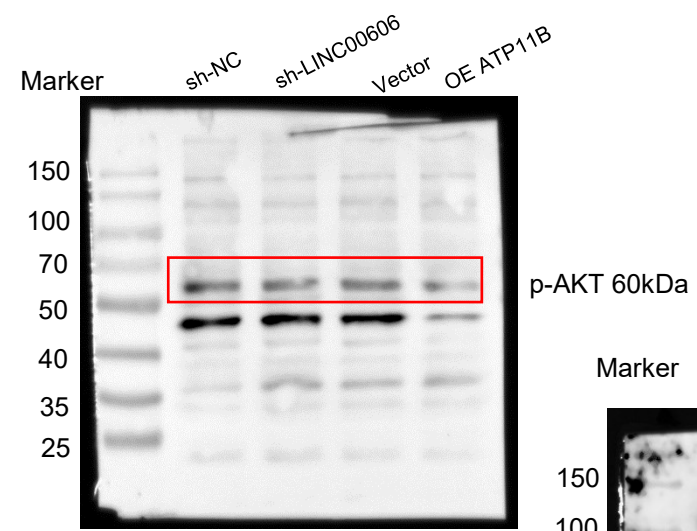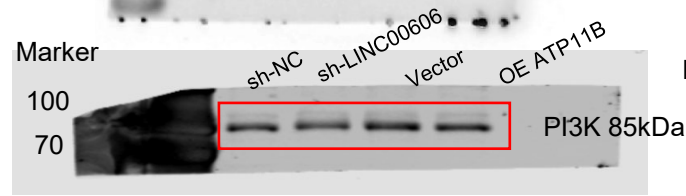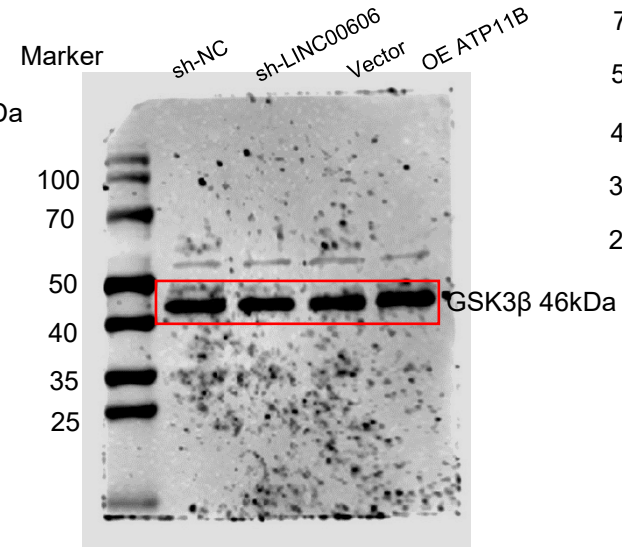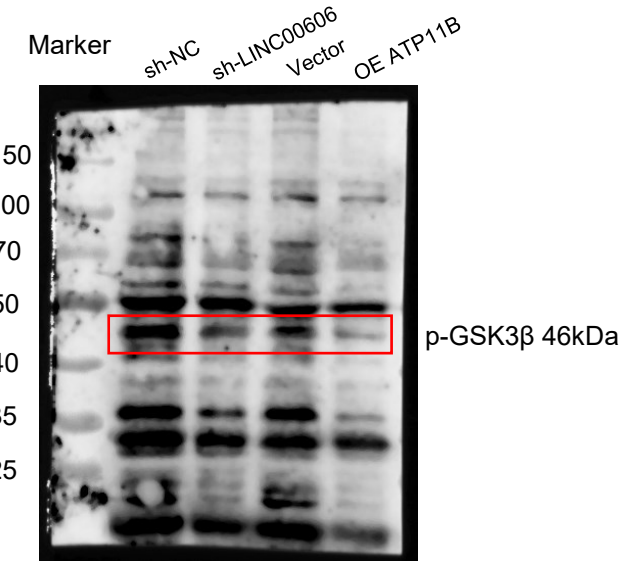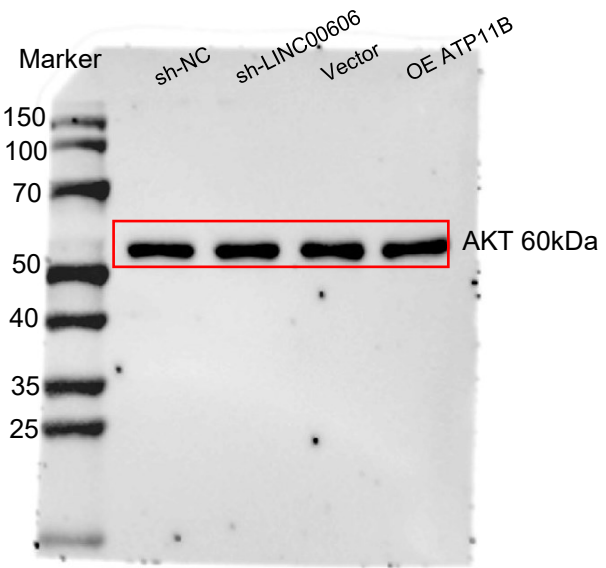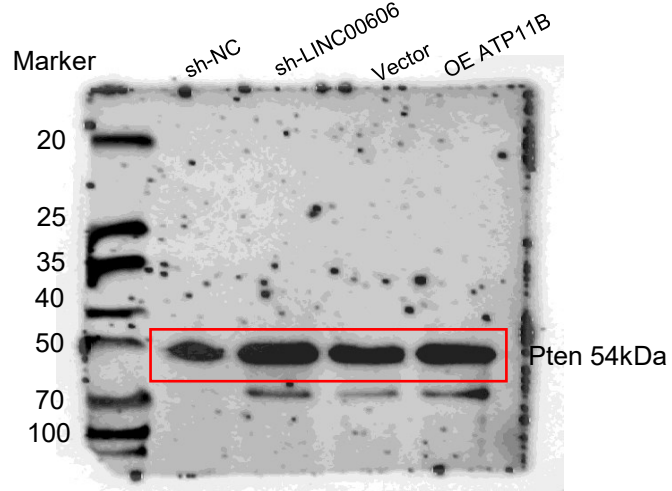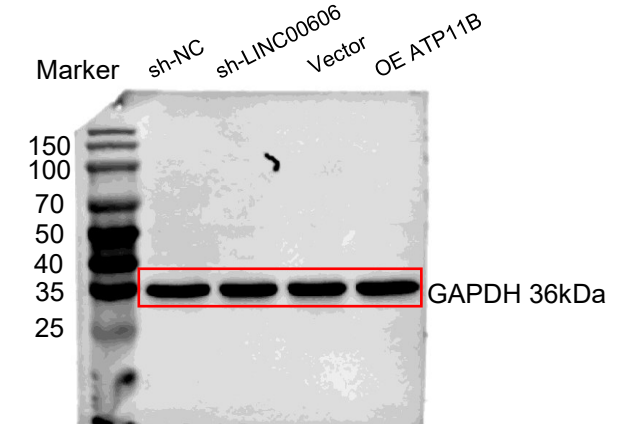



# Supplementary Fig S2 b

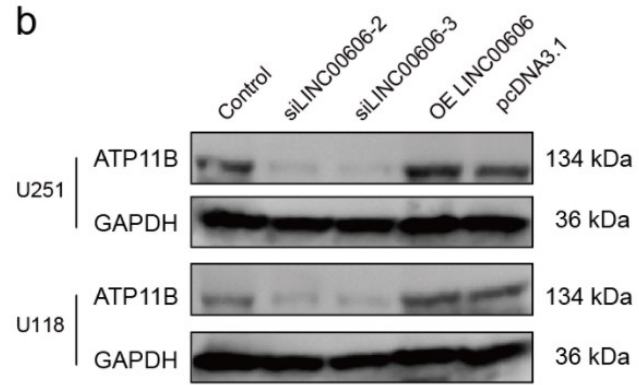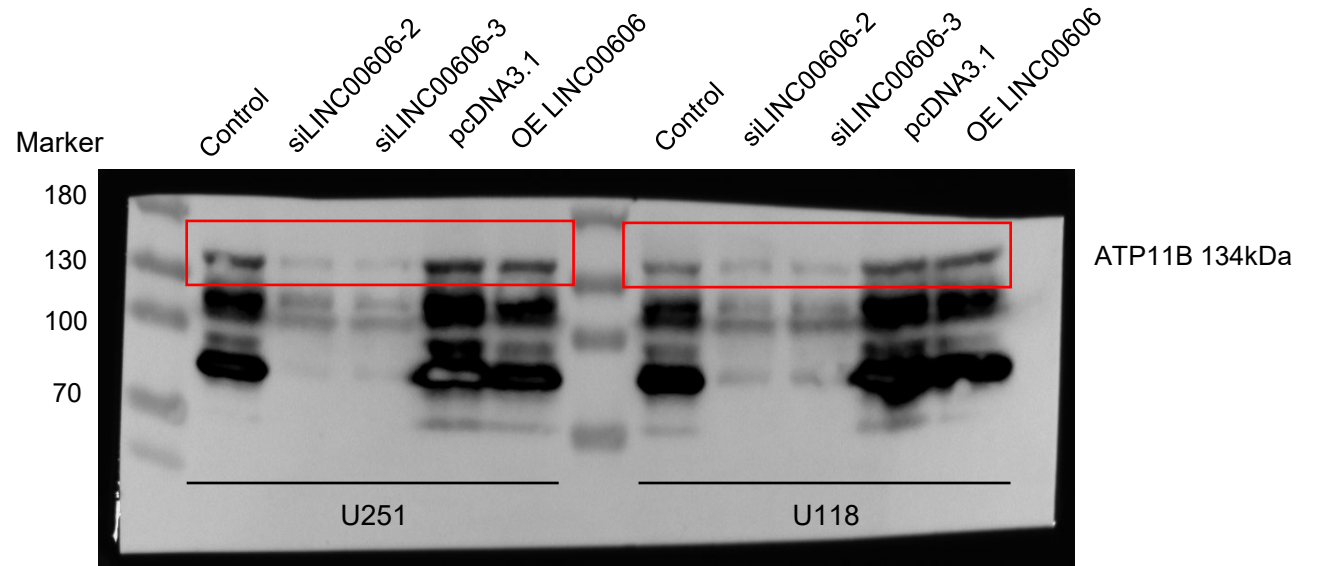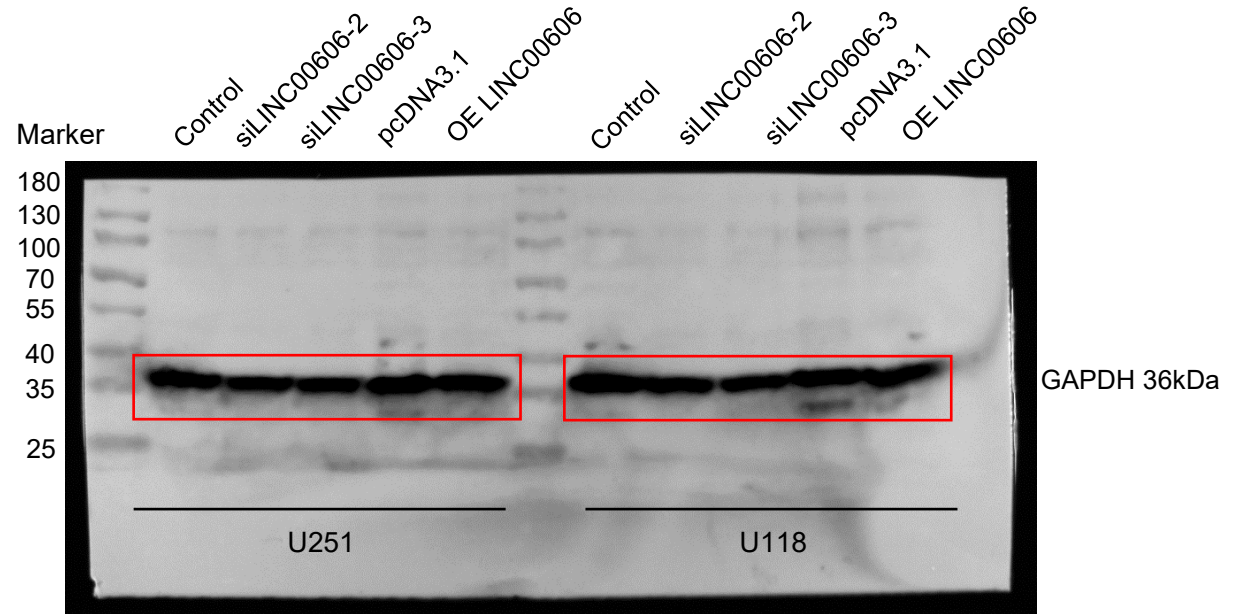

Supplement: MOESM2 [file 27072770]
